# Supplementary material for: Mapping Cell-in-Cell Structures in Oral Squamous Cell Carcinoma
Source: MDPI journal article supplement (doi:10.3390/cells12192418), 2023-10-08
Supplement: s1 [file s1]

## SUPPLEMENTARY FILE

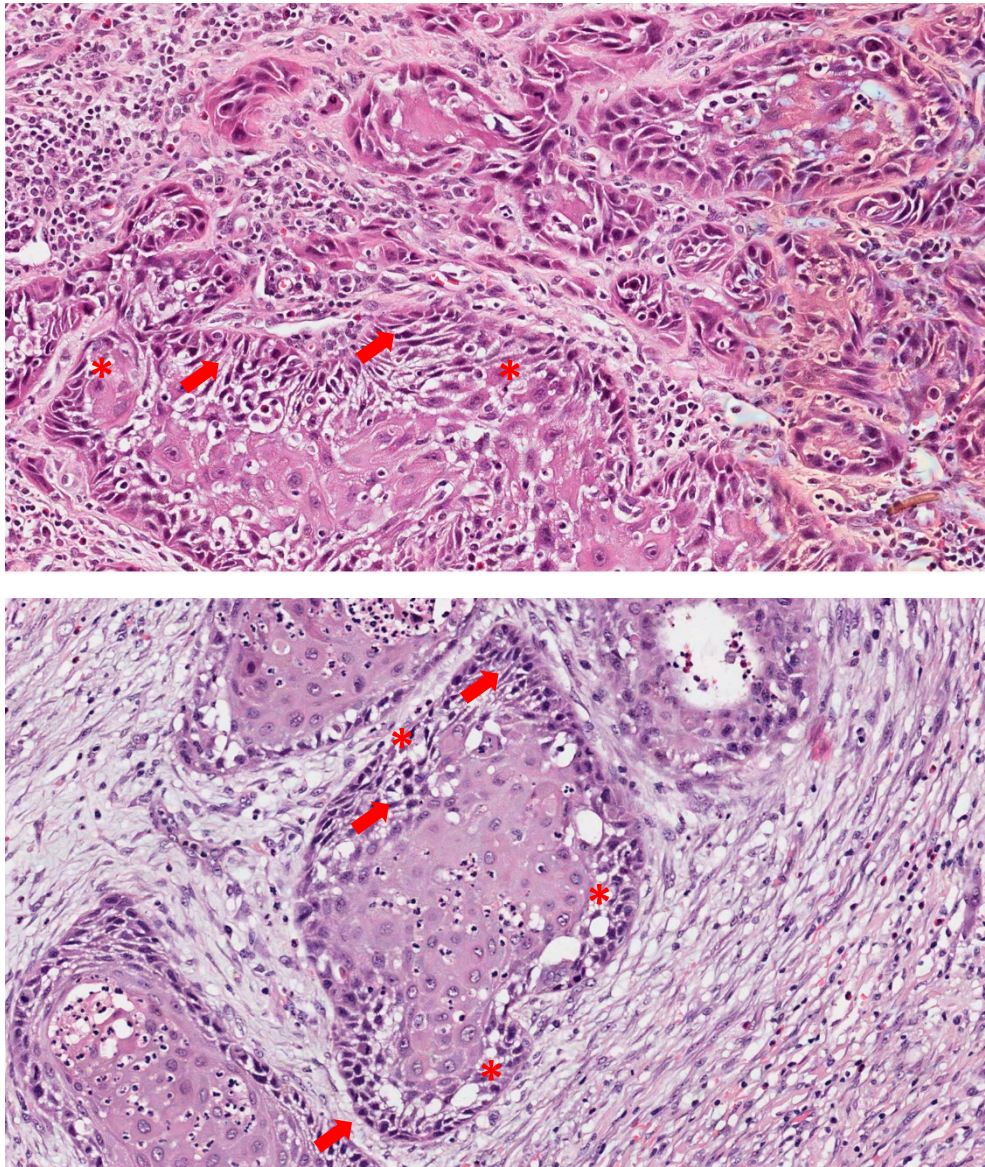

**Supplementary Figure S1.** Histomorphological aspects of oral squamous cell carcinoma. Islands of epithelial cells exhibiting polyhedral format with intercellular bridges. Especially in the periphery of the tumor islands, we also observe cells in a fusiform pattern. Cellular hyperchromatism (red arrows) and clear cytoplasm (\*) may also be observed. Magnification: 400x.
